# Supplementary material for: Individualised tailored assessment of therapeutic alternatives for HCC patients within the Milan criteria
Source: PubMed Central journal article supplement — Gut. 2019 Nov 20;69(10):1893–5. doi: 10.1136/gutjnl-2019-320073 (PMC7497580; doi:10.1136/gutjnl-2019-320073), 2019-11-20
Supplement: gutjnl-2019-320073supp001.pdf [file gutjnl-2019-320073supp001.pdf]

**Table Supplement 1** Baseline Characteristics

| Covariates                 | Before IPTW-adjustment |              |              | P value |
|----------------------------|------------------------|--------------|--------------|---------|
|                            | LT                     | LR           | LA           |         |
| Number of patients         | 100                    | 89           | 94           |         |
| Gender (male) (%)          | 87 (30.74)             | 68 (24.03)   | 71 (25.09)   | 0.069   |
| Age (years)                | 52.33 (9.33)           | 55.20 (9.43) | 58.79 (9.06) | < 0.001 |
| BMI (kg/m <sup>2</sup> )   | 25.03 (3.55)           | 24.91 (3.36) | 24.33 (3.56) | 0.275   |
| Hypertension (%)           | 13 (4.59)              | 12 (4.24)    | 30 (10.60)   | 0.002   |
| Diabetes mellitus (%)      | 20 (7.07)              | 11 (3.89)    | 19 (6.71)    | 0.280   |
| Etiology (%)               |                        |              |              | 0.091   |
| HBV                        | 75 (26.50)             | 72 (25.44)   | 77 (27.21)   |         |
| HCV                        | 14 (4.95)              | 3 (1.06)     | 8 (2.83)     |         |
| Others                     | 11 (3.89)              | 14 (4.95)    | 9 (3.18)     |         |
| In(AFP) (ng/ml)            | 2.68 (1.92)            | 3.59 (2.16)  | 2.95 (1.84)  | 0.004   |
| MELD score                 | 10.31 (4.17)           | 8.12 (2.49)  | 8.93 (2.87)  | < 0.001 |
| Child-Pugh score           | 6.32 (1.43)            | 5.51 (0.88)  | 5.97 (1.14)  | < 0.001 |
| ALBI score                 | -2.25 (0.60)           | -2.59 (0.58) | -2.36 (0.62) | < 0.001 |
| In(APRI score)             | 0.20 (1.03)            | -0.41 (1.05) | 0.00 (1.00)  | < 0.001 |
| Portal hypertension (%)    | 68 (24.03)             | 35 (12.37)   | 85 (30.04)   | < 0.001 |
| Ascites (%)                | 33 (11.66)             | 12 (4.24)    | 26 (9.19)    | 0.005   |
| Cirrhosis (%)              | 100 (35.34)            | 68 (24.03)   | 90 (31.80)   | < 0.001 |
| BCLC staging (%)           |                        |              |              | 0.399   |
| 0                          | 9 (3.18)               | 7 (2.47)     | 4 (1.41)     |         |
| A                          | 91 (32.16)             | 82 (28.98)   | 90 (31.80)   |         |
| Tumor characteristics (%)  |                        |              |              | 0.672   |
| Solitary 0-3 cm            | 35 (12.37)             | 29 (10.25)   | 38 (13.43)   |         |
| Multiple 0-3 cm            | 35 (12.37)             | 31 (10.95)   | 25 (8.83)    |         |
| Solitary 3-5 cm            | 30 (10.60)             | 29 (10.25)   | 31 (10.95)   |         |
| Tumor differentiation (%)  |                        |              |              |         |
| Well                       | 38 (13.43)             | 27 (9.54)    | 8 (2.83)     | 0.496   |
| Moderate                   | 55 (19.43)             | 50 (17.67)   | 10 (3.53)    |         |
| Poor                       | 7 (2.47)               | 12 (4.24)    | 1 (0.35)     |         |
| Missing                    | 0 (0.00)               | 0 (0.00)     | 75 (26.50)   |         |
| Microvascular Invasion (%) |                        |              |              | 0.839   |
| Absent                     | 86 (30.39)             | 75 (26.50)   | 0 (0.00)     |         |
| Present                    | 14 (4.95)              | 14 (4.95)    | 0 (0.00)     |         |
| Missing                    | 0 (0.00)               | 0 (0.00)     | 94 (33.22)   |         |

Continuous variables were summarized by their means and standard deviations, and categorical variables were summarized by counts and

proportions.

LT, liver transplantation; LR, liver resection; LA, local ablation; IPTW, inverse probability of treatment weighting; BMI, body mass index;

HBV, hepatitis B virus; HCV, hepatitis C virus; AFP,  $\alpha$ -fetoprotein; MELD, Model for End-stage Liver Disease; ALBI, Albumin-Bilirubin;

APRI, Aspartate aminotransferase-to-Platelet Ratio Index; BCLC, Barcelona Clinic Liver Cancer.

**Table Supplement 2** Baseline Characteristics after IPTW-adjustment

| Covariates                | After IPTW-adjustment |              |              | P value |
|---------------------------|-----------------------|--------------|--------------|---------|
|                           | LT                    | LR           | LA           |         |
| Number of patients        | 101                   | 85           | 86           |         |
| Gender (male) (%)         | 82 (30.04)            | 65 (23.81)   | 68 (24.91)   | 0.638   |
| Age (years)               | 54.93 (9.12)          | 55.22 (9.45) | 55.97 (9.98) | 0.743   |
| BMI (kg/m <sup>2</sup> )  | 25.05 (3.62)          | 24.55 (3.62) | 24.69 (3.27) | 0.595   |
| Hypertension (%)          | 18 (6.64)             | 15 (5.54)    | 16 (5.90)    | 1.000   |
| Diabetes mellitus (%)     | 20 (7.35)             | 15 (5.51)    | 17 (6.25)    | 0.947   |
| In(AFP) (ng/ml)           | 3.24 (2.35)           | 3.16 (1.93)  | 2.65 (1.80)  | 0.111   |
| MELD score                | 9.04 (3.62)           | 8.83 (2.88)  | 9.01 (2.88)  | 0.889   |
| Child-Pugh score          | 6.00 (1.30)           | 5.80 (1.00)  | 5.94 (1.16)  | 0.489   |
| ALBI score                | -2.41 (0.55)          | -2.41 (0.64) | -2.41 (0.65) | 1.000   |
| In(APRI score)            | 0.02 (0.94)           | -0.04 (1.12) | 0.02 (1.07)  | 0.889   |
| Portal hypertension (%)   | 63 (23.25)            | 55 (20.30)   | 63 (23.25)   | 0.302   |
| Ascites (%)               | 24 (8.86)             | 20 (7.38)    | 23 (8.49)    | 0.863   |
| Tumor characteristics (%) |                       |              |              | 0.269   |
| Solitary ≤3 cm            | 33 (12.18)            | 33 (12.18)   | 41 (15.13)   |         |
| Multiple ≤3 cm            | 39 (14.39)            | 31 (11.44)   | 23 (8.49)    |         |
| Solitary 3-5 cm           | 29 (10.70)            | 21 (7.75)    | 21 (7.75)    |         |

Continuous variables were summarized by their means and standard deviations, and categorical variables were summarized by counts and proportions.

LT, liver transplantation; LR, liver resection; LA, local ablation; IPTW, inverse probability of treatment weighting; BMI, body mass index; AFP,  $\alpha$ -fetoprotein; MELD, Model for End-stage Liver Disease; ALBI, Albumin-Bilirubin; APRI, Aspartate aminotransferase-to-Platelet Ratio Index; BCLC, Barcelona Clinic Liver Cancer.

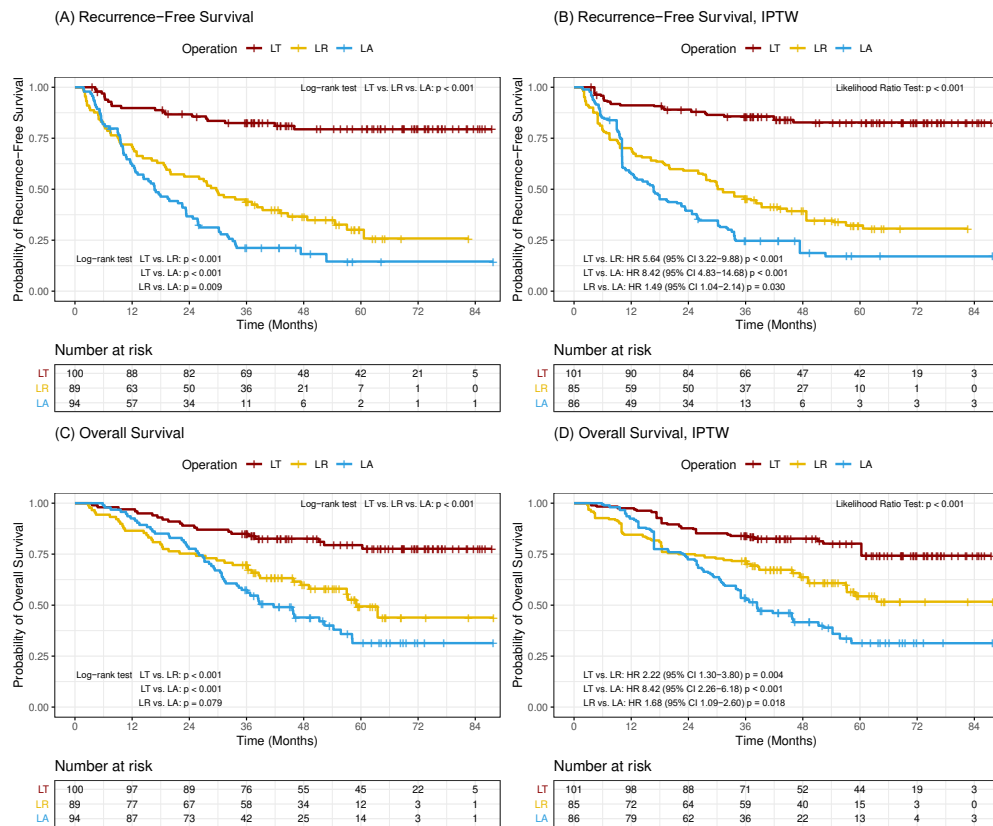

**Figure Supplement 1** Comparison of RFS and OS among three treatment groups  
 Comparison of RFS among the three treatment groups before (A) and after IPTW-adjustment (B). Comparison of OS among the three treatment groups before (C) and after IPTW-adjustment (D).

LT, liver transplantation; LR, liver resection; LA, local ablation; IPTW, inverse probability of treatment weighting; RFS, recurrence-free survival; OS, overall survival; HR, hazard ratio; CI, confidence interval.

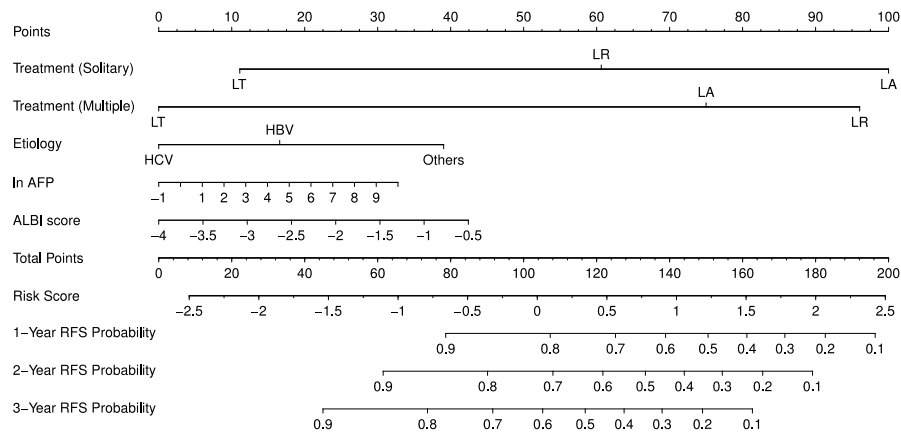

**Figure Supplement 2** Nomogram of recurrence prediction based on Model 2

LT, liver transplantation; LR, liver resection; LA, local ablation; HBV, hepatitis B virus; HCV, hepatitis C virus; AFP,  $\alpha$ -fetoprotein; ALBI, Albumin-Bilirubin; RFS, recurrence-free survival.

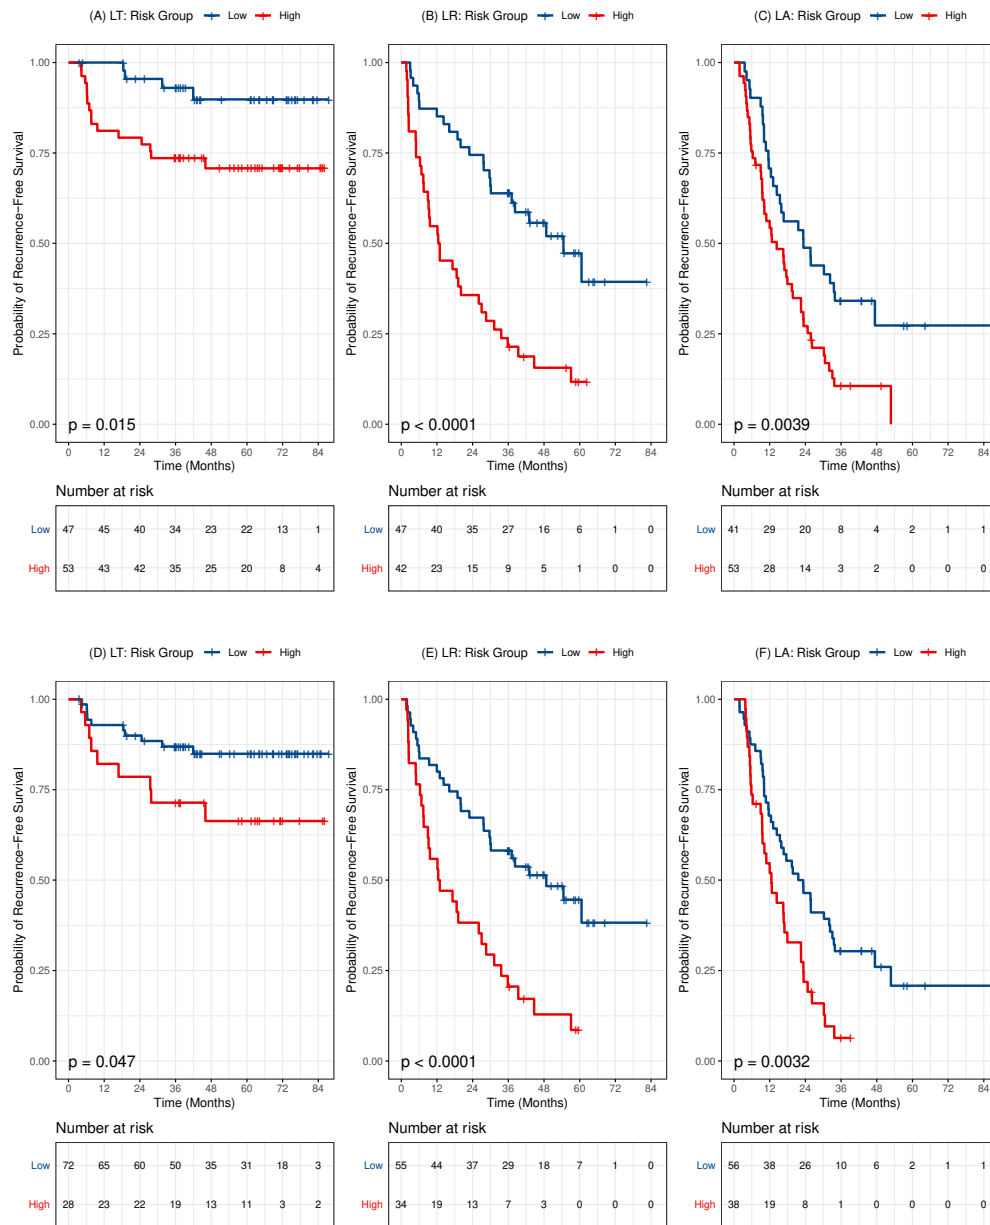

**Figure Supplement 3** Kaplan-Meier curves of recurrence risk stratification for the three treatments

Kaplan-Meier curves of recurrence risk stratification for LT(A), LR(B), and LA(C) based on Model 1. Kaplan-Meier curves of recurrence risk stratification for LT(D), LR(E), and LA(F) based on Model 2.

LT, liver transplantation; LR, liver resection; LA, local ablation.
